# Supplementary material for: Per- and Polyfluoroalkyl Substances: Impacts on Morphology, Behavior and Lipid Levels in Zebrafish Embryos
Source: MDPI journal article supplement (doi:10.3390/toxics12030192), 2024-02-29
Supplement: s1 [file s1]

## *Supplementary Material*

### 1 Tables

Table S1. Number of fish used in the behavior analysis for each chemical treatment. Each treatment began with 96 embryos.

| Chemical | Media Concentration (ppm) | Mortality at 96 hpf | Mortality at 120 hpf | Behavior Analysis          |                                  | Final Total |
|----------|---------------------------|---------------------|----------------------|----------------------------|----------------------------------|-------------|
|          |                           |                     |                      | Removed due to deformities | Removed due to Tracking Problems |             |
| PFOA     | 0                         | 0                   | 0                    | 0                          | 0                                | 88          |
|          | 188                       | 0                   | 0                    | 0                          | 1                                | 87          |
|          | 242                       | 1                   | 2                    | 1                          | 1                                | 90          |
|          | 253                       | 0                   | 2                    | 0                          | 1                                | 93          |
|          | 294                       | 4                   | 11                   | 0                          | 1                                | 84          |
|          | 375                       | 6                   | 16                   | 0                          | 1                                | 79          |
| PFHxS    | 0                         | 2                   | 2                    | 0                          | 0                                | 94          |
|          | 6.35                      | 1                   | 2                    | 1                          | 0                                | 94          |
|          | 8.70                      | 0                   | 6                    | 0                          | 0                                | 89          |
|          | 10.15                     | 1                   | 16                   | 5                          | 0                                | 75          |
|          | 11.50                     | 0                   | 39                   | 7                          | 0                                | 50          |
|          | 14.35                     | 2                   | 52                   | 10                         | 1                                | 33          |
| PFOS     | 0                         | 2                   | 2                    | NA                         | NA                               | NA          |
|          | 1.21                      | 0                   | 4                    | NA                         | NA                               | NA          |
|          | 1.40                      | 2                   | 13                   | NA                         | NA                               | NA          |
|          | 1.86                      | 1                   | 31                   | NA                         | NA                               | NA          |
|          | 2.03                      | 2                   | 50                   | NA                         | NA                               | NA          |
|          | 2.42                      | 9                   | 59                   | NA                         | NA                               | NA          |

Table S2. Description of behavior endpoints examined in this study.

| Behavior Endpoint               | Definition                                                                                                                                                                                                                                          |
|---------------------------------|-----------------------------------------------------------------------------------------------------------------------------------------------------------------------------------------------------------------------------------------------------|
| Total Distance Traveled (mm)    | Total distanced traveled during swimming bouts for the entire 24 minute assay.                                                                                                                                                                      |
| Total Time Swimming (sec)       | Total time embryo was swimming during 24 minute test.                                                                                                                                                                                               |
| Overall Step Length (mm)        | Per frame distance traveled during a 0.033 second period (one frame to the next) averaged over the entire 24 minute test [i.e. includes zeros when fish moved less than 1 mm/s for more than 5 frames (0.166 sec)].                                 |
| Overall Step Length Variation   | Standard deviation of distance traveled during 0.033 second period (one frame to the next).                                                                                                                                                         |
| Overall Turning Angle           | Turning angle during 0.033 second period (one frame to the next) averaged over frames when fish were swimming. Ranges from -3.14 to 3.14, where negative values indicate right turns and positive values indicate left turns.                       |
| Overall Turning Angle Variation | Standard deviation of per frame turning angle during 0.033 second period (one frame to the next).                                                                                                                                                   |
| Swimming Bouts (per sec)        | The number of active swimming bouts per second. A swimming bout was defined as movement at least 1 mm/s for more than 5 frames (0.166 sec).                                                                                                         |
| Swimming Bout Duration (sec)    | Mean duration of all swimming bouts averaged over the 24 minute period.                                                                                                                                                                             |
| Swimming Bout Speed (mm/s)      | Per frame swimming speed averaged during a swimming bout; average bout speed averaged over the 24 minute period.                                                                                                                                    |
| Swimming Bout Turning Angle     | Per frame absolute turning angle averaged during a swimming bout; average absolute turning angle averaged over the 24 minute period. Ranges from -3.14 to 3.14, where negative values indicate right turns and positive values indicate left turns. |
| Startle Magnitude (mm/sec)      | Maximum velocity within 5 seconds after the startle after subtracting the speed the embryo was swimming at the time of the startle                                                                                                                  |
| Startle Response time (sec)     | Difference in time between the startle and the maximum distance traveled within 5 seconds after the startle                                                                                                                                         |
| Startle Distance (mm)           | Distance traveled from the time of the startle to the time of startle magnitude                                                                                                                                                                     |
| Distance after Startle (mm)     | Distance traveled from the time of the startle to 5 seconds after the startle                                                                                                                                                                       |

Table S3. Number of embryos in each pooled lipidomics sample

| Chemical | Plate | Number of Embryos used in Lipid Omics |          |          |          |          |          |
|----------|-------|---------------------------------------|----------|----------|----------|----------|----------|
|          |       | 0 ppm                                 | 188 ppm  | 242 ppm  | 253 ppm  | 294 ppm  | 375 ppm  |
| PFOA     | 2     | 8                                     | 8        | 8        | 8        | 6        | 5        |
|          | 5     | 8                                     | 8        | 7        | 8        | 7        | 7        |
|          | 9     | 8                                     | 8        | 8        | 8        | 7        | 8        |
|          | 10    | 8                                     | 8        | 8        | 6        | 6        | 8        |
|          | 12    | 8                                     | 8        | 8        | 8        | 7        | 6        |
| PFHxS    |       | 0 ppm                                 | 6.4 ppm  | 8.7 ppm  | 10.2 ppm | 11.5 ppm | 14.4 ppm |
|          | 4     | 8                                     | 8        | 6        | 0        | 0        | 0        |
|          | 5     | 8                                     | 7        | 7        | 3        | 0        | 0        |
|          | 6     | 7                                     | 8        | 8        | 0        | 0        | 0        |
|          | 11    | 7                                     | 8        | 4        | 6        | 0        | 0        |
|          | 1     | 8                                     | 8        | 8        | 5        | 4        | 3        |
|          | 2     | 8                                     | 8        | 8        | 6        | 4        | 2        |
| PFOS     |       | 0 ppm                                 | 1.21 ppm | 1.40 ppm | 1.86 ppm | 2.03 ppm | 2.42 ppm |
|          | 1     | 8                                     | 8        | 7        | 7        | 4        | 3        |
|          | 2     | 7                                     | 8        | 7        | 8        | 6        | 2        |
|          | 3     | 8                                     | 8        | 8        | 7        | 3        | 3        |
|          | 4     | 8                                     | 7        | 7        | 6        | 5        | 3        |
|          | 5     | 8                                     | 8        | 7        | 7        | 2        | 2        |

Table S4. Details of lipid standards used in lipidomics analysis.

| Compound Formula      | Compound Name   | Alternative Name | Mass of Ion | Used to Quantify | Scan Mode | Adduct Detected        | nmol/sample |
|-----------------------|-----------------|------------------|-------------|------------------|-----------|------------------------|-------------|
| C21H44O7PN            | lysoPC(13:0)    |                  | 454.3       | LysoPC           | +Prec184  | [M+H] <sup>+</sup>     | 0.12        |
| C27H56O7PN            | lysoPC(19:0)    |                  | 538.3       | LysoPC           | +Prec184  | [M+H] <sup>+</sup>     | 0.12        |
| C32H64O8PN            | PC(12:0/12:0)   |                  | 622.4       | PC               | +Prec184  | [M+H] <sup>+</sup>     | 0.12        |
| C56H108O8PN           | PC(24:1/24:1)   |                  | 954.9       | PC               | +Prec184  | [M+H] <sup>+</sup>     | 0.12        |
| C19H40O7PN            | lysoPE(14:0)    |                  | 426.3       | LysoPE           | +NL141    | [M+H] <sup>+</sup>     | 0.06        |
| C23H48O7PN            | lysoPE(18:0)    |                  | 482.3       | LysoPE           | +NL141    | [M+H] <sup>+</sup>     | 0.06        |
| C29H58O8PN            | PE(12:0/12:0)   |                  | 580.5       | PE               | +NL141    | [M+H] <sup>+</sup>     | 0.06        |
| C45H90O8PN            | PE(20:0/20:0)   | diphytanoyl PE   | 804.7       | PE               | +NL141    | [M+H] <sup>+</sup>     | 0.06        |
| C34H67O10P            | PG(14:0/14:0)   |                  | 684.5       | PG               | +NL189    | [M + NH4] <sup>+</sup> | 0.06        |
| C46H91O10P            | PG(20:0/20:0)   | diphytanoyl PG   | 852.7       | PG               | +NL189    | [M + NH4] <sup>+</sup> | 0.06        |
| C34H66O10PN           | PS(14:0/14:0)   |                  | 680.6       | PS               | +NL185    | [M+H] <sup>+</sup>     | 0.04        |
| C46H90O10PN           | PS(20:0/20:0)   | diphytanoyl PS   | 848.8       | PS               | +NL185    | [M+H] <sup>+</sup>     | 0.04        |
| C31H61O8P             | PA(14:0/14:0)   |                  | 610.5       | PA               | +NL115    | [M + NH4] <sup>+</sup> | 0.06        |
| C43H85O8P             | PA(20:0/20:0)   | diphytanoyl PA   | 778.7       | PA               | +NL115    | [M + NH4] <sup>+</sup> | 0.06        |
| C43H83O13P            | PI(16:0/18:0)   |                  | 856.70      | PI               | +NL277    | [M + NH4] <sup>+</sup> | 0.06        |
| C15H30O2 <sup>a</sup> | 15:0 FA         |                  | 241.20      | fatty acids      | +MS1      | [M + NH4] <sup>+</sup> | 0.20        |
| C15H30O2 <sup>b</sup> | 15:0 fatty acid |                  | 241.2       | free fatty acids | MS1       | [M-H] <sup>-</sup>     | 0.2         |

<sup>a</sup> for PFAS

treatments

<sup>b</sup> for PFOA and PFHxS treatments

Table S5. Parameters and setting for the XEVO-TQS#WAA627 instrument to determine lipid quantities using in the lipidomics analysis. Method a: animalPL-negPG022219.EXP method: continuous infusion from loop, method b: FFA-negMS1-032917.EXP. Constant settings included: Automatic cycle time, source temperature of 150oC, desolvation temperature of 250oC, cone gas flow of 150 L/Hr, desolvation gas flow of 650 L/Hr, nebuliser gas flow of 7 bar, acquisition cone voltage of 40V, and data subtraction of (1, 40, 0.01).

Found in supplementary .xlsx file

Table S6. List of lipids examined in this study.

Found in supplementary .xlsx file

Table S7. Results from individual permutation ANOVAs conducted in this study.

Found in supplementary .xlsx file

Table S8. Results from Tukey HSD pairwise comparison tests.

Found in supplementary .xlsx file

Table S9. Significant results from Tukey HSD significant pairwise comparison tests organized to show which endpoint increased (green) or decreased (red) after exposure to various PFASs chemical concentrations.

Found in supplementary .xlsx file

Table S10. Predicted chemical concentrations at 10 and 50% lethality on 120 hpf embryos.

| Substrate | Chemical          | Predicted Concentration Lethal to 10% of Embryos (ppm) |                |                  |          | Predicted Concentration Lethal to 50% of Embryos (ppm) |                |                  |               |
|-----------|-------------------|--------------------------------------------------------|----------------|------------------|----------|--------------------------------------------------------|----------------|------------------|---------------|
|           |                   | Mean                                                   | Standard Error | Confidence Limit |          | Mean                                                   | Standard Error | Confidence Limit |               |
|           |                   |                                                        |                | Lower            | Upper    |                                                        |                | Lower            | Upper         |
| Media     | PFOA              | 318.08                                                 | 1.47           | 149.88           | 675.01   | 528.64                                                 | 3.01           | 60.91            | 4587.93       |
|           | PFHxS             | 8.55                                                   | 1.51           | 3.82             | 19.15    | 14.28                                                  | 1.51           | 6.34             | 32.18         |
|           | PFOS              | 1.41                                                   | 1.43           | 0.696            | 2.84     | 2.14                                                   | 1.28           | 1.32             | 3.46          |
| Tissue    | PFOA              | 498.07                                                 | 3.90           | 34.55            | 7180.33  | 2030.12                                                | 883.78         | 0.00             | 1208508074.98 |
|           | PFHxS             | 58.83                                                  | 2.66           | 8.67             | 399.16   | 124.27                                                 | 3.61           | 10.05            | 1536.50       |
|           | PFOS <sup>a</sup> | 14.05                                                  | 85.75          | 0.00             | 86434.23 | 849.85                                                 | 46.35          | 0.46             | 1566064.13    |

<sup>a</sup> This model is uncertain due to high variance between treatments.

Table S11. Model parameters used to estimate lethal dose concentrations.

| Substrate | Chemical          | Best Fit Model | Intercept Parameter Estimates |         |         |         | Log <sub>10</sub> (Media or Tissue Concentration) Parameter Estimates |        |         |         | Model Variance Estimates |             |               |                  |
|-----------|-------------------|----------------|-------------------------------|---------|---------|---------|-----------------------------------------------------------------------|--------|---------|---------|--------------------------|-------------|---------------|------------------|
|           |                   |                | Mean                          | Std     | Z-value | P-value | Mean                                                                  | Std    | Z-value | P-value | Residual Deviance        | Residual df | Null Deviance | Null Deviance df |
| Media     | PFOA              | Probit         | -15.8178                      | 27.5889 | -0.5733 | 0.5664  | 2.5227                                                                | 4.8139 | 0.5240  | 0.6003  | 0.0453                   | 3           | 0.3758        | 4                |
|           | PFHxS             | Probit         | -6.6528                       | 7.3478  | -0.9054 | 0.3653  | 2.5022                                                                | 3.0477 | 0.8210  | 0.4116  | 0.0986                   | 3           | 0.9262        | 4                |
|           | PFOS              | Probit         | -2.3274                       | 2.0263  | -1.1486 | 0.2507  | 3.0647                                                                | 3.0219 | 1.0142  | 0.3105  | 0.0482                   | 3           | 1.3228        | 4                |
| Tissue    | PFOA              | Probit         | -6.9461                       | 22.3648 | -0.3106 | 0.7561  | 0.9121                                                                | 3.7384 | 0.2440  | 0.8073  | 0.3160                   | 4           | 0.4972        | 5                |
|           | PFHxS             | Probit         | -8.2640                       | 21.4975 | -0.3844 | 0.7007  | 1.7136                                                                | 4.8928 | 0.3502  | 0.7262  | 0.8047                   | 4           | 1.3916        | 5                |
|           | PFOS <sup>a</sup> | Probit         | -2.1070                       | 2.8206  | -0.7470 | 0.4551  | 0.3124                                                                | 0.5656 | 0.5523  | 0.5807  | 1.5686                   | 4           | 1.9945        | 5                |

<sup>a</sup> This model is uncertain due to high variance between treatments.



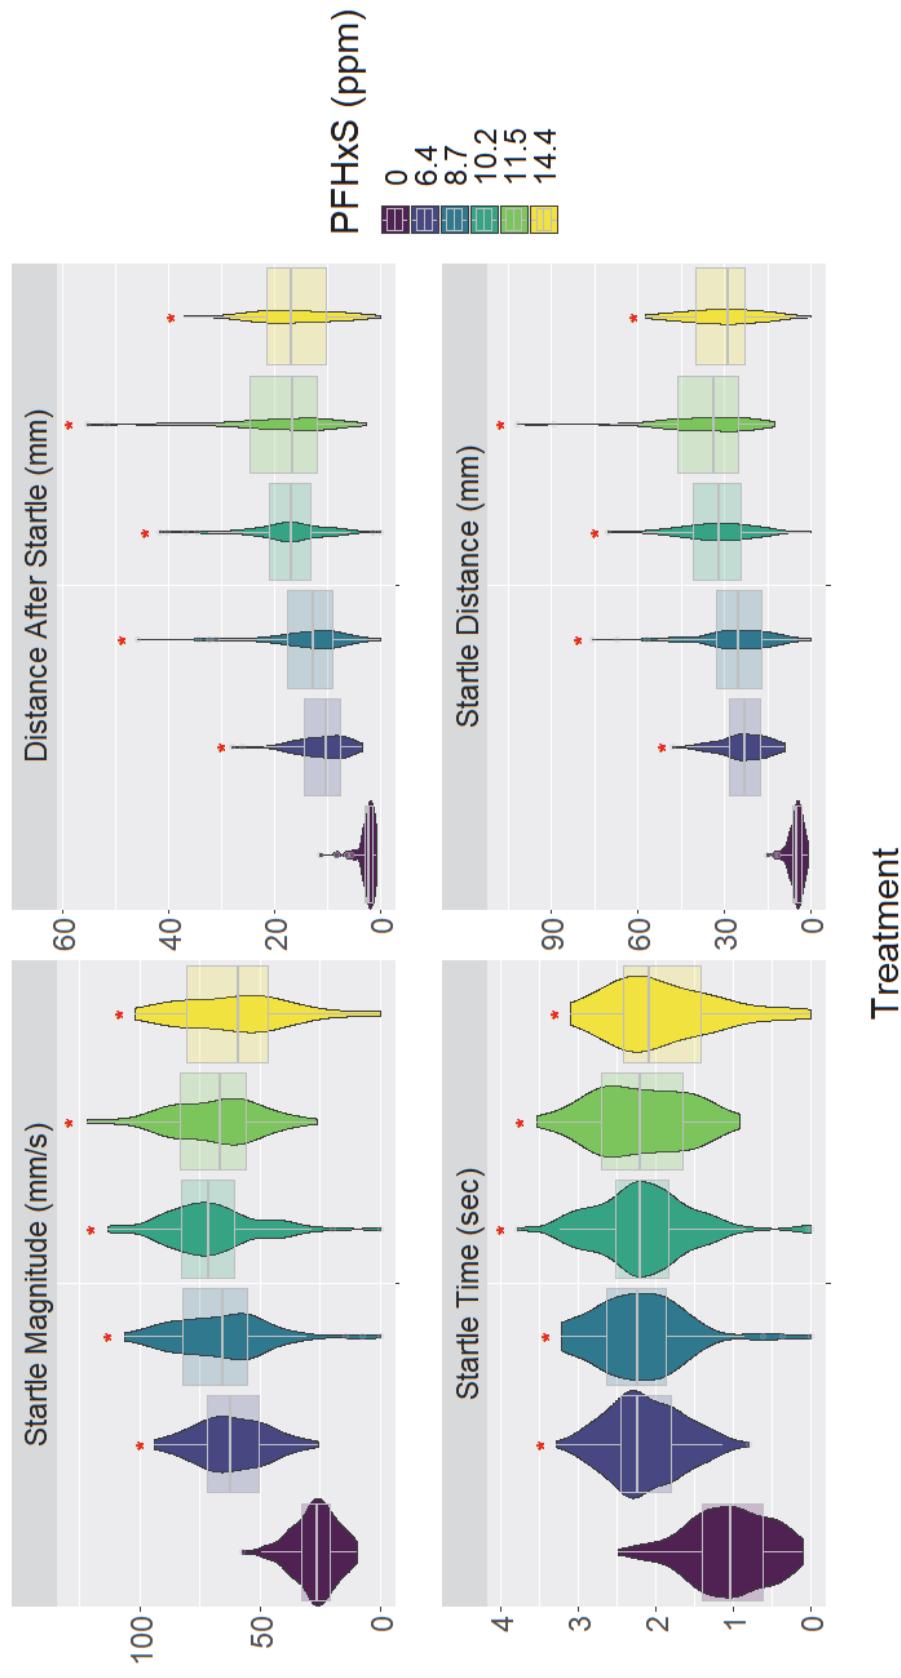

Figure S2. PFHxS treatment impacts on zebrafish embryo behaviors that described the reaction response after a visual startle. PFHxS concentrations are from the media used in each treatment. Red asterisk indicates significant difference between treatment and control groups. Data are presented as violin plots overlaid with the 95<sup>th</sup> percentile box plot.

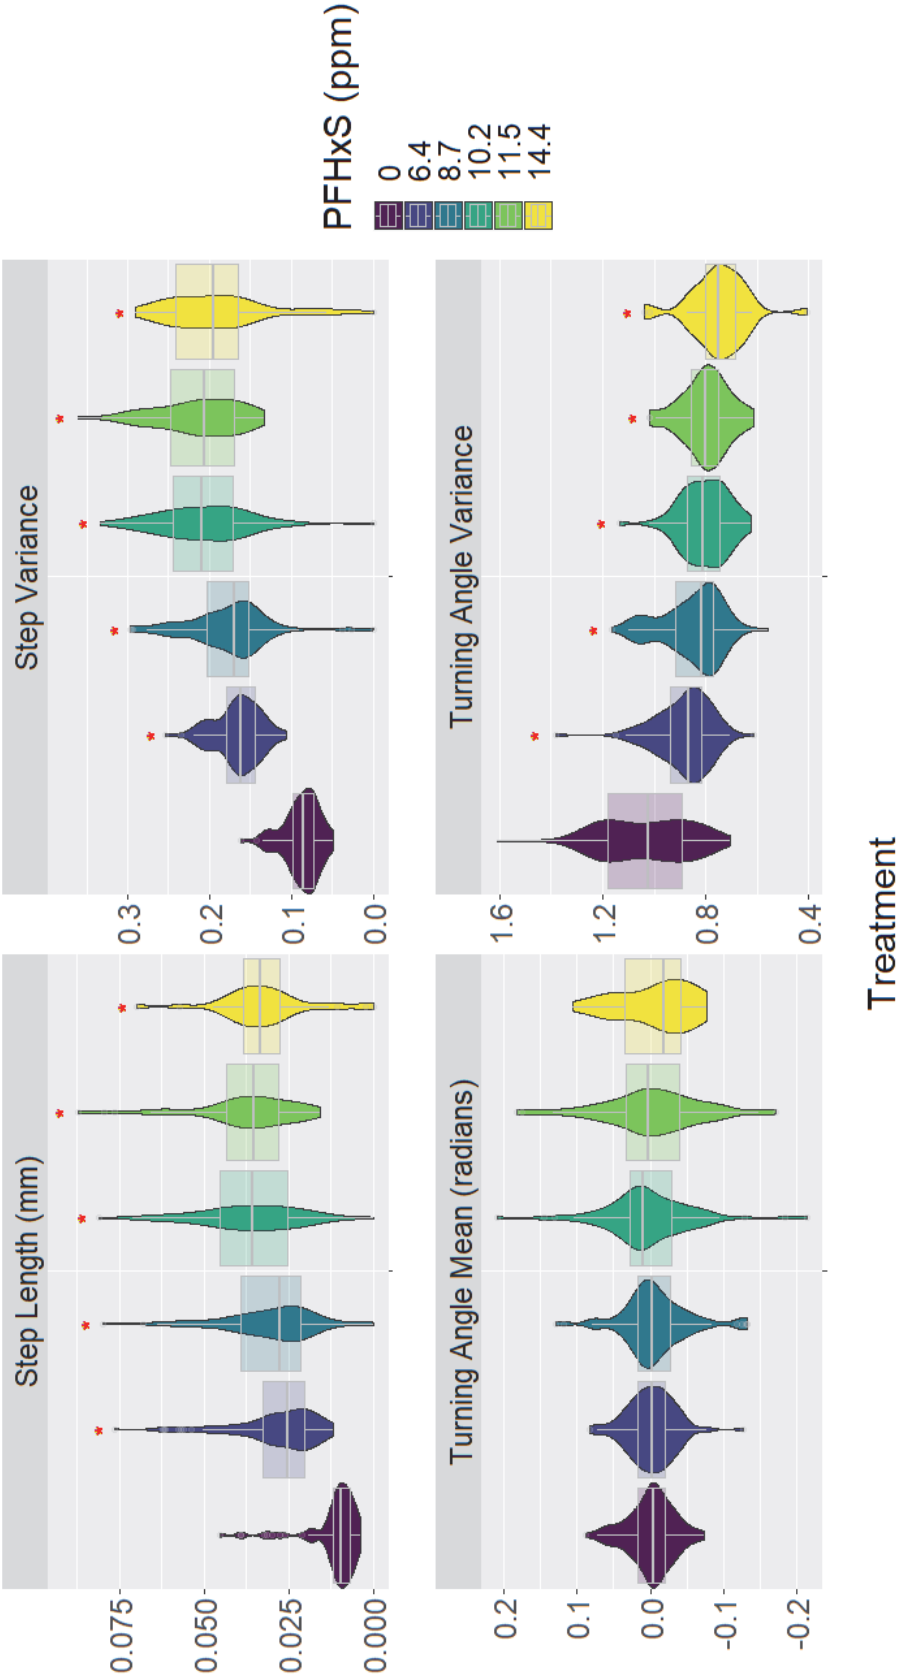

Figure S3. PFHxS treatment impacts on zebrafish embryo swimming behavior. PFHxS concentrations are from the media used in each treatment. Red asterisk indicates significant difference between treatment and control groups. Data are presented as violin plots overlaid with the 95<sup>th</sup> percentile box plot.

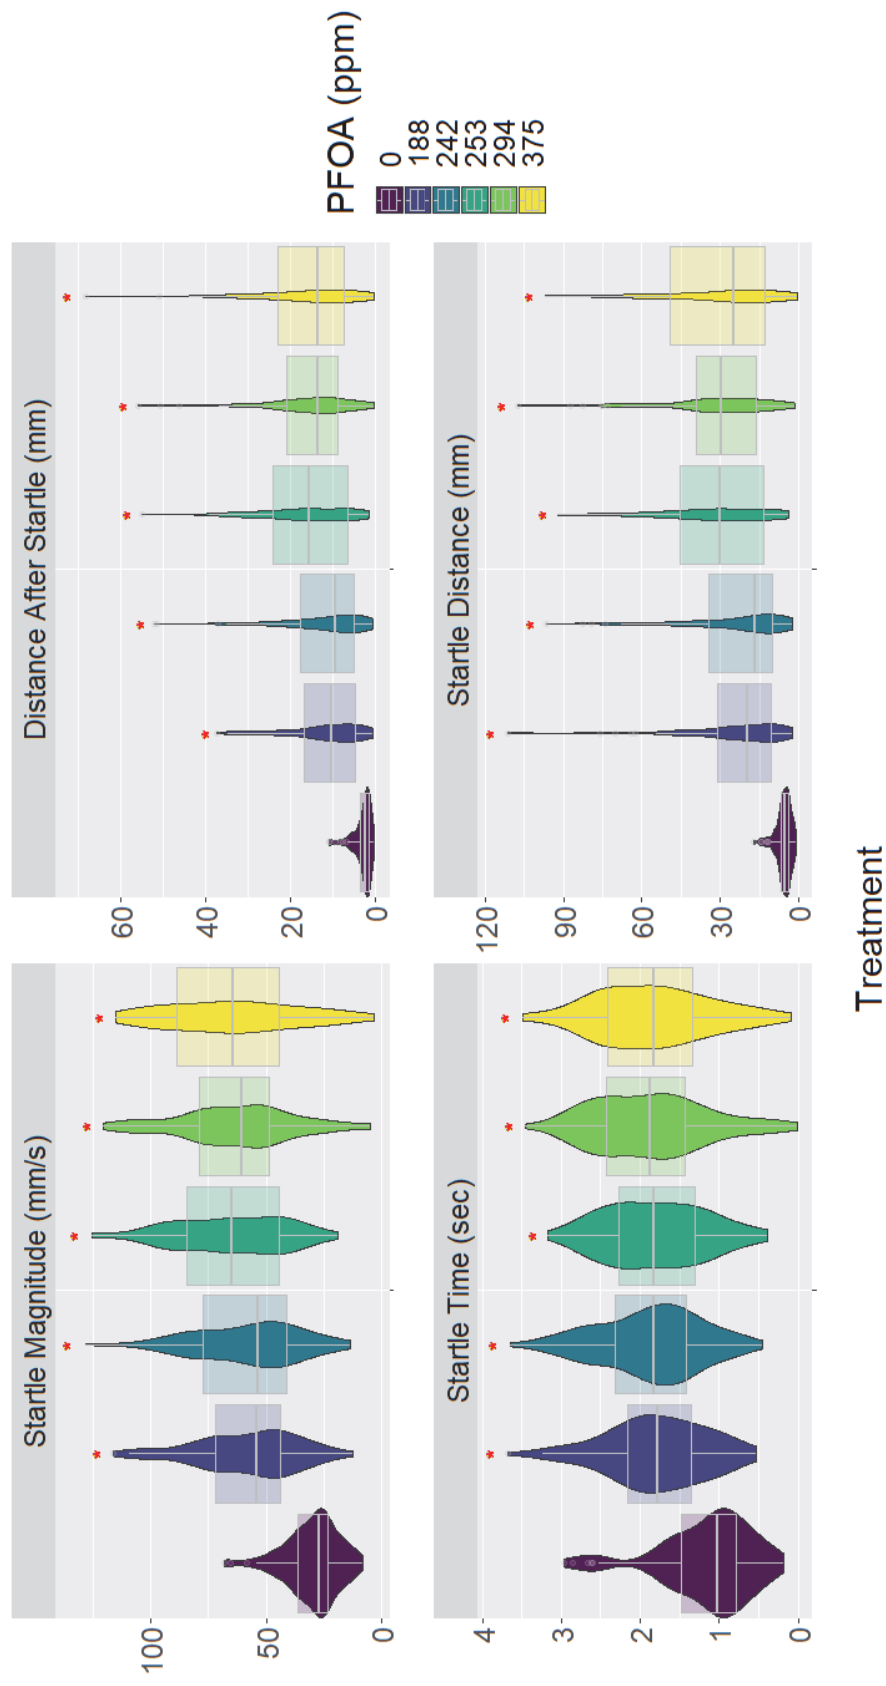

Figure S4. PFOA treatment impacts on zebrafish embryo behaviors that describe the reaction response after a visual startle. PFOA concentrations are from the media used in each treatment. Red asterisk indicates significant difference between treatment and control groups. Data are presented as violin plots overlaid with the 95<sup>th</sup> percentile box plot.

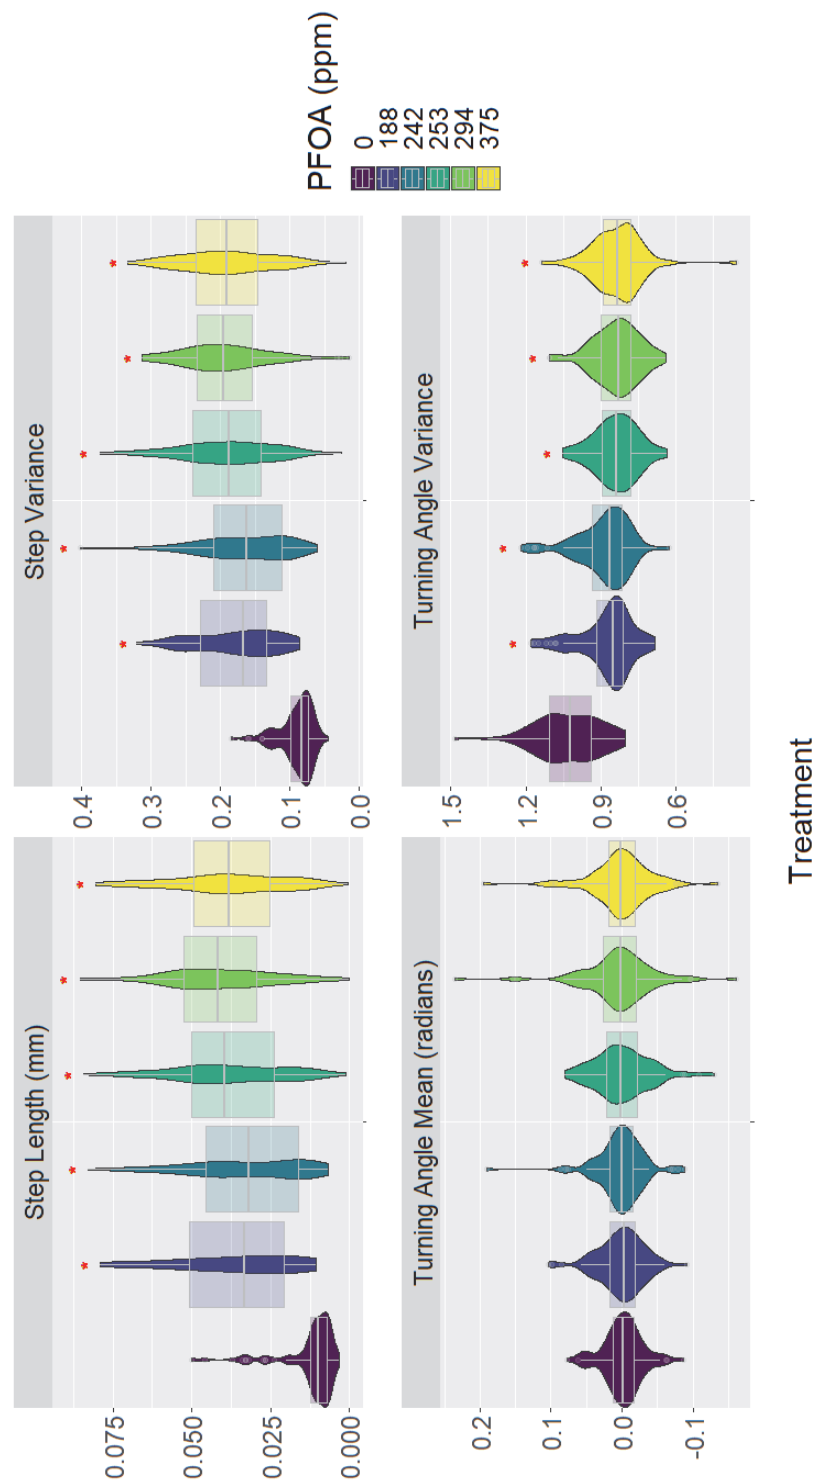

Figure S5. PFOA treatment impacts on zebrafish embryo swimming behavior. PFOA concentrations are from the media used in each treatment. Red asterisk indicates significant difference between treatment and control groups. Data are presented as violin plots overlaid with the 95<sup>th</sup> percentile box plot.
